# Supplementary material for: Changes in the burden and underlying causes of heart failure in the Eastern Mediterranean Region, 1990–2019: An analysis of the Global Burden of Disease Study 2019
Source: PubMed Central journal article supplement (PMC9803705; doi:10.1016/j.eclinm.2022.101788), 2022-12-26
Supplement: mmc1.pdf [file mmc1.pdf]

## **Supplementary material**

### **Data sources**

A large number of data sources was used by GBD 2019 such as surveys, epidemiological studies, systematic review and meta-analysis, censuses, vital statistics, and other health and population-related data sources including, Population Health Research Institute, World Health Organization Regional Office for the Eastern Mediterranean (EMRO-WHO), Ministry of Health, Central Statistical Organization, General Secretariat for Development Planning, Ministry of Development Planning and Statistics, National Health Authority, International Statistical Institute, Population Council (Interim Demographic and Health Survey), Central Organization for Statistics and Information Technology, General Information Authority, Committee for Health and Social Insurance, Public Commission for Health Care Planning, National Institute of Public Health, Comprehensive Health and Education Forum International.

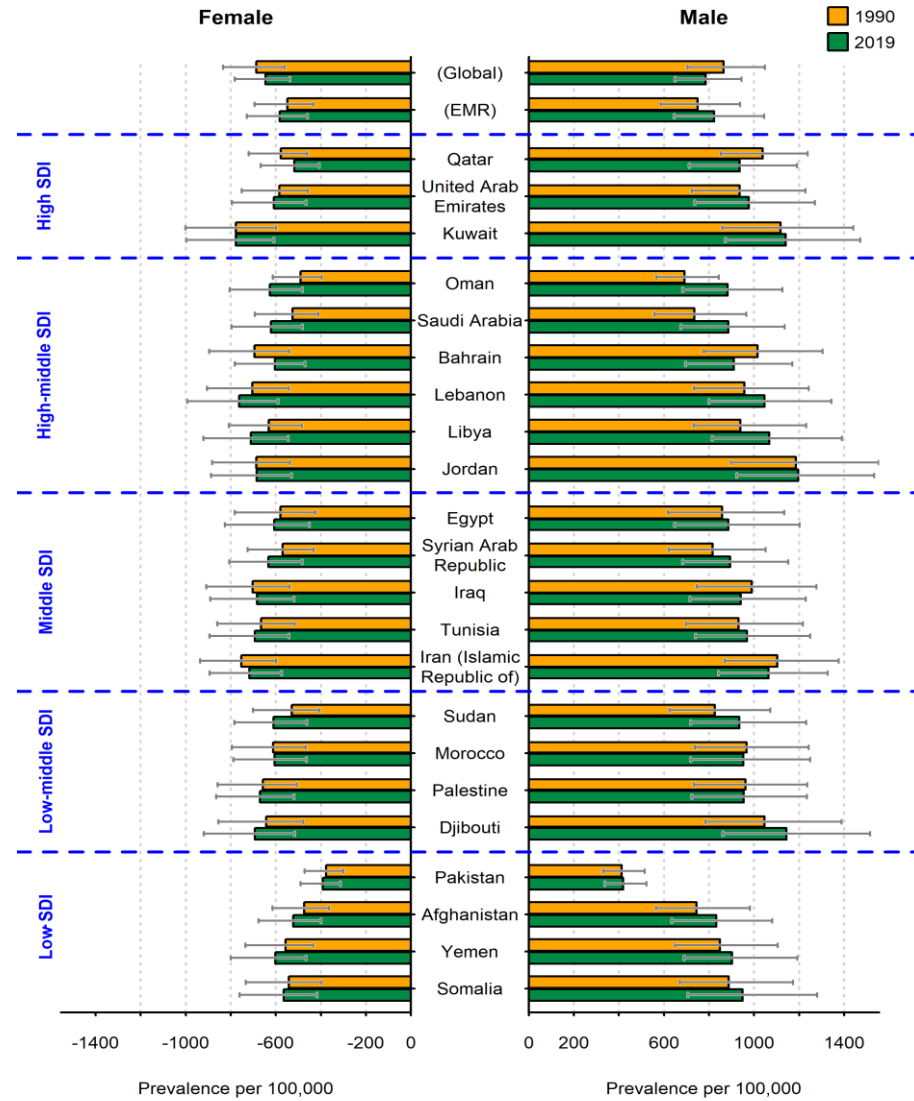

Figure S1: Age-standardised prevalence rate of heart failure (per 100,000 persons) for males and females in EMR countries in 1990 and 2019.

Error bars indicate 95% uncertainty intervals. EMR=Eastern Mediterranean Region. SDI=Socio-demographic Index

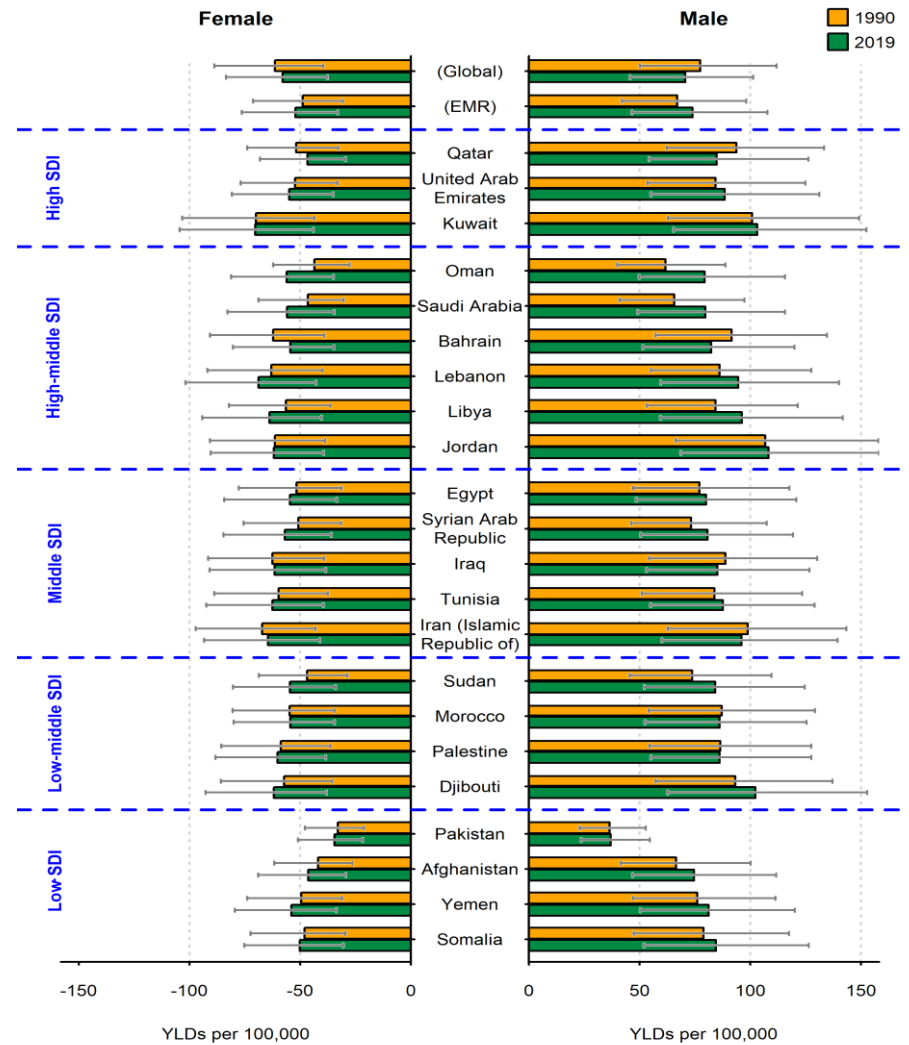

Figure S2: Age-standardised YLD rate of heart failure (per 100,000 persons) for males and females in EMR countries in 1990 and 2019.

Error bars indicate 95% uncertainty intervals. YLD= years lived with disability. EMR=Eastern Mediterranean Region. SDI=Socio-demographic Index

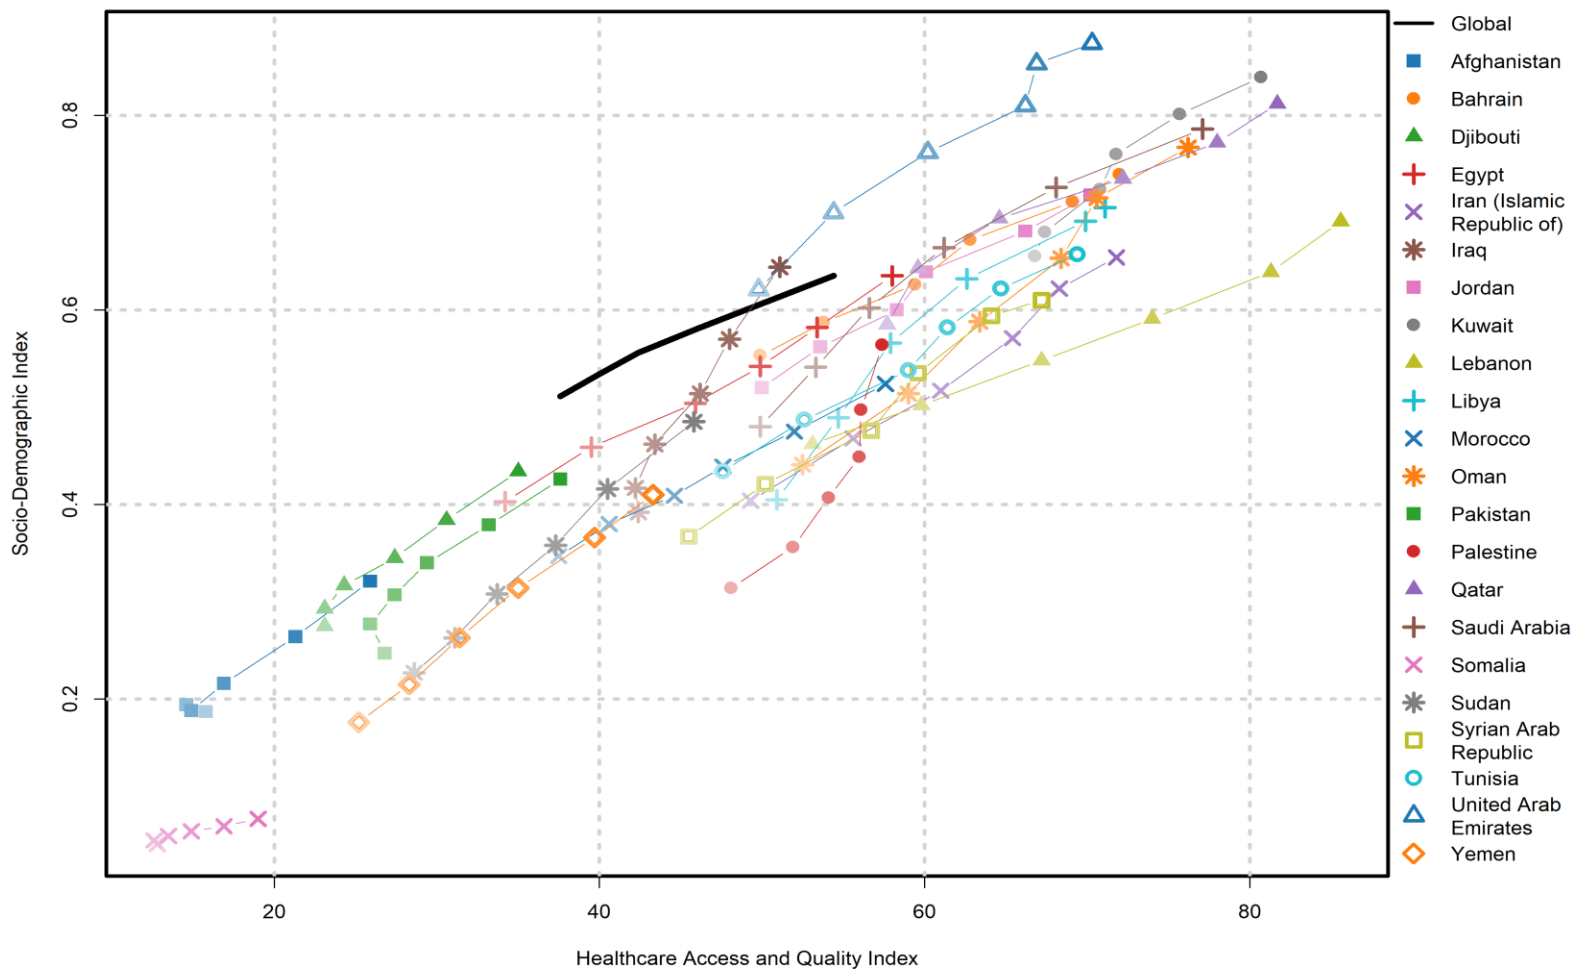

**Figure S3: The HAQ Index and level of SDI for 22 EMR countries in 1990,1995, 2000,2005, 2010 and 2016.**

For each country, points from left to right illustrate estimates for each 5-year from 1990 and 2016.

HAQ= Healthcare Access and Quality. SDI=Socio-demographic Index. EMR=Eastern Mediterranean Region.

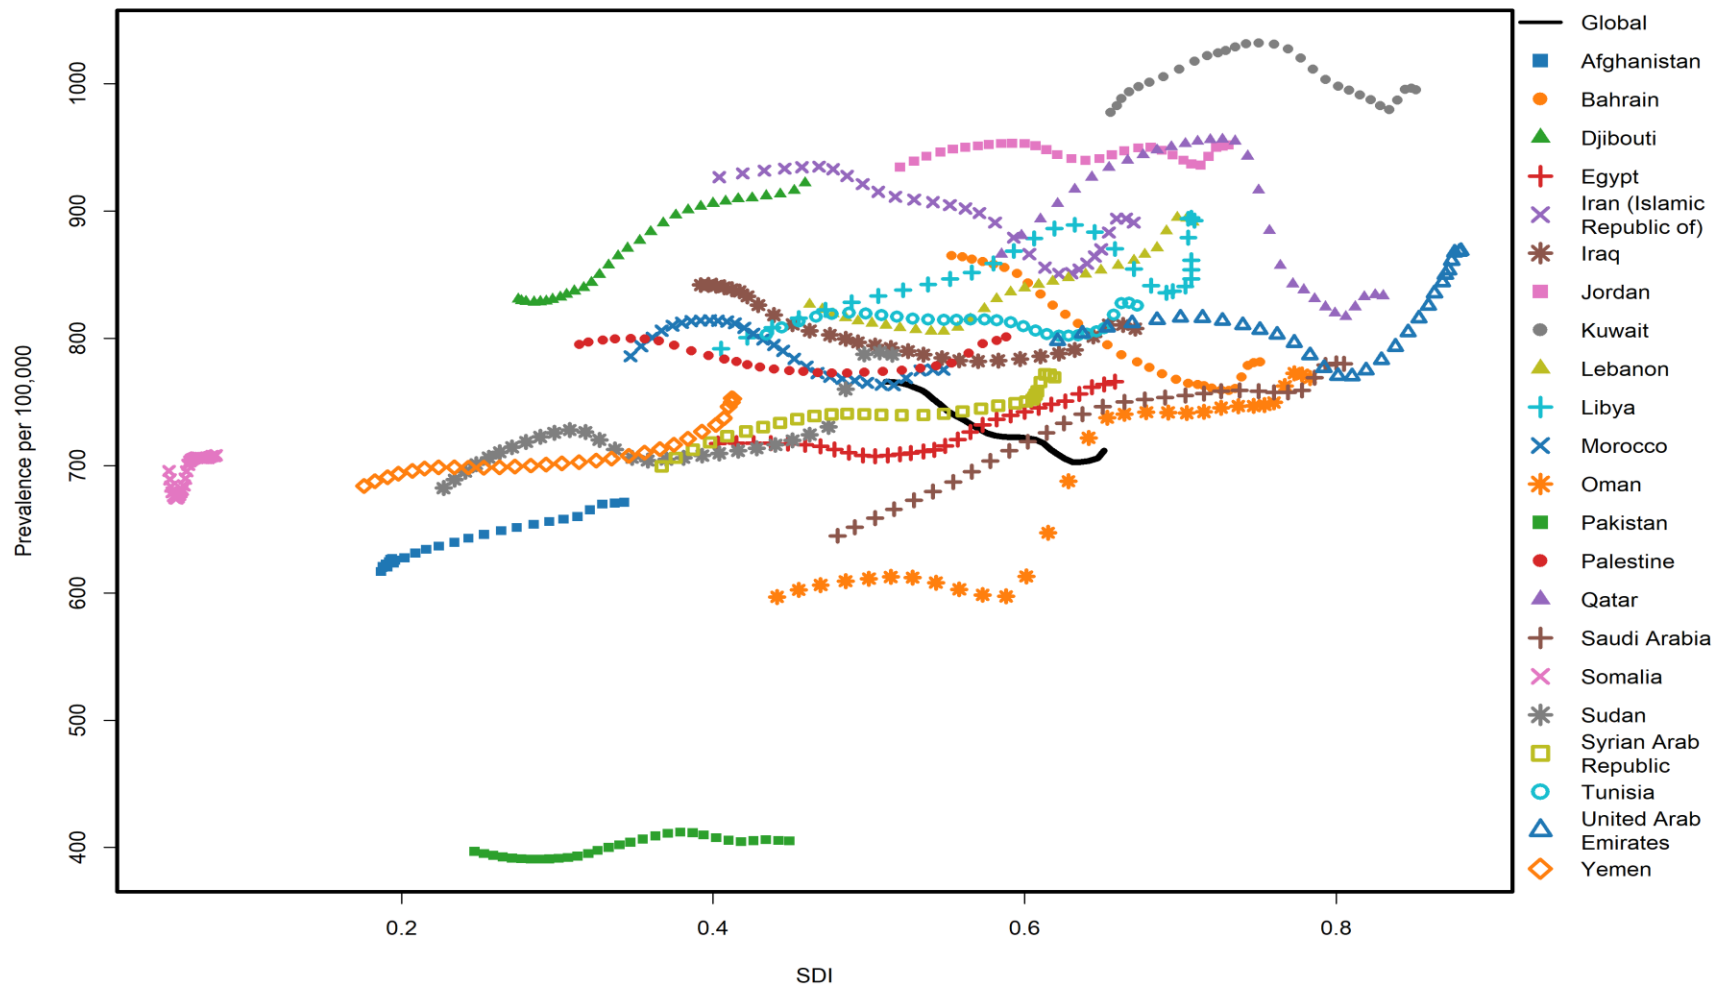

**Figure S4: Trends in age-standardised prevalence rate of heart failure for 22 EMR countries by SDI, 1990–2019.**

For each country, points from left to right illustrate estimates for each year from 1990 to 2019.

SDI=Socio-demographic Index. EMR=Eastern Mediterranean Region.

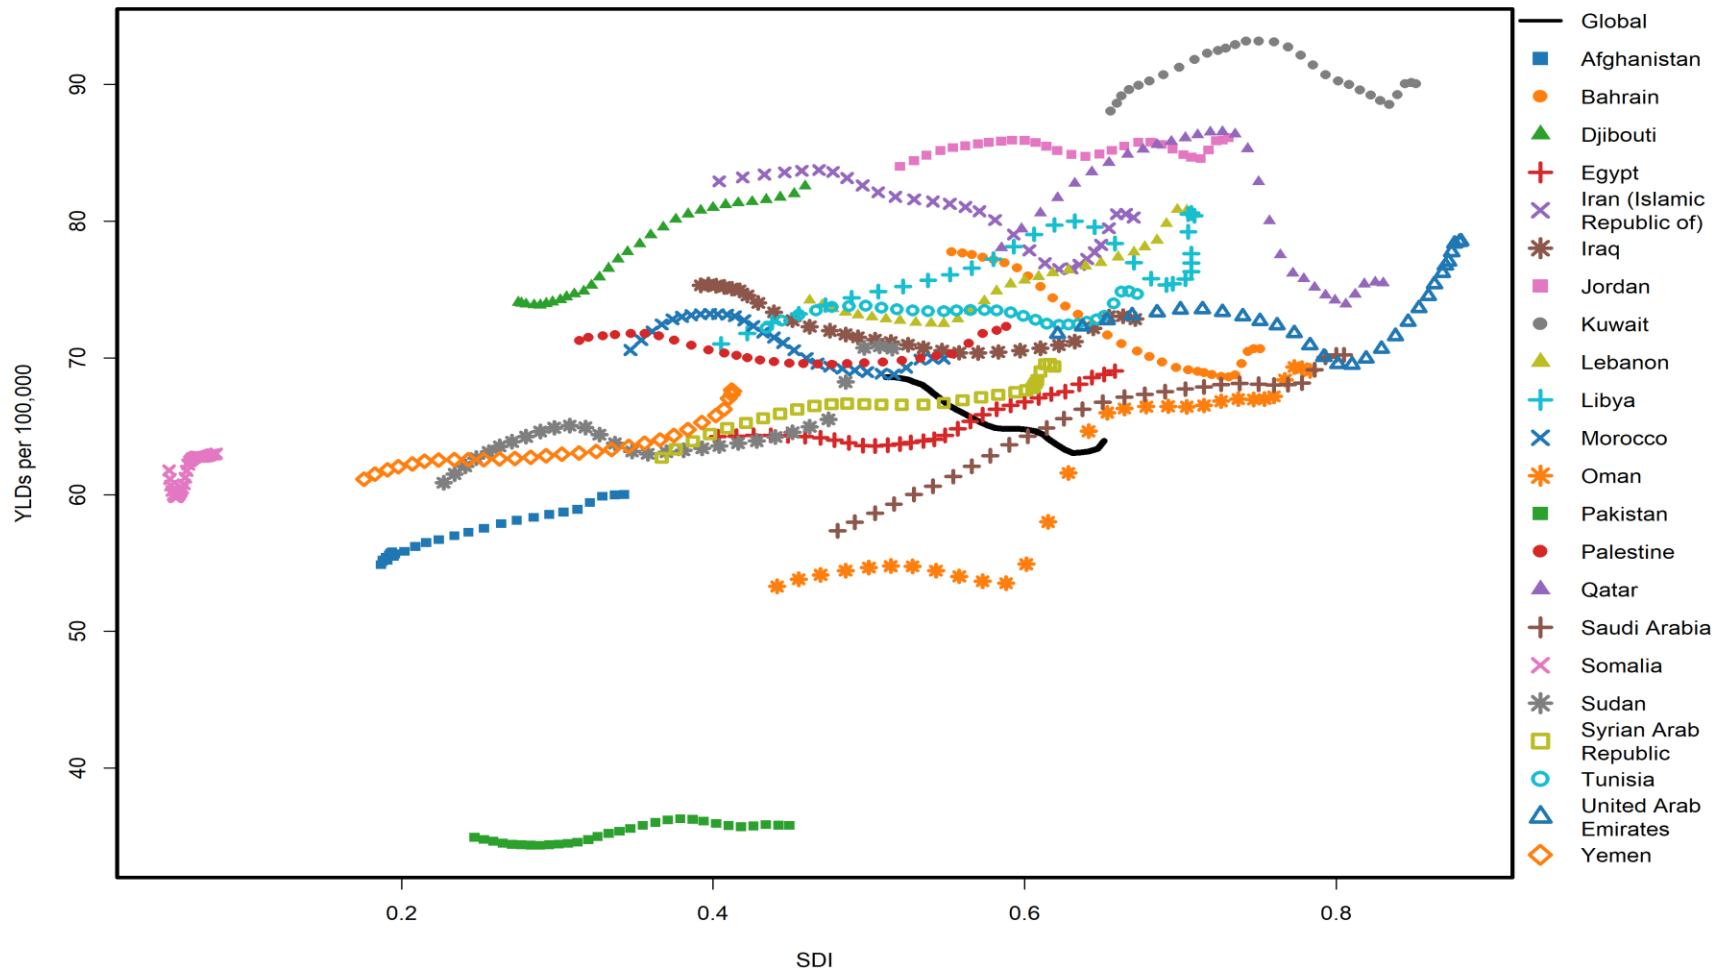

**Figure S5: Trends in age-standardised YLD rate of heart failure for 22 EMR countries by SDI, 1990–2019.**

For each country, points from left to right illustrate estimates for each year from 1990 to 2019.

YLD= years lived with disability. SDI=Socio-demographic Index. EMR=Eastern Mediterranean Region.

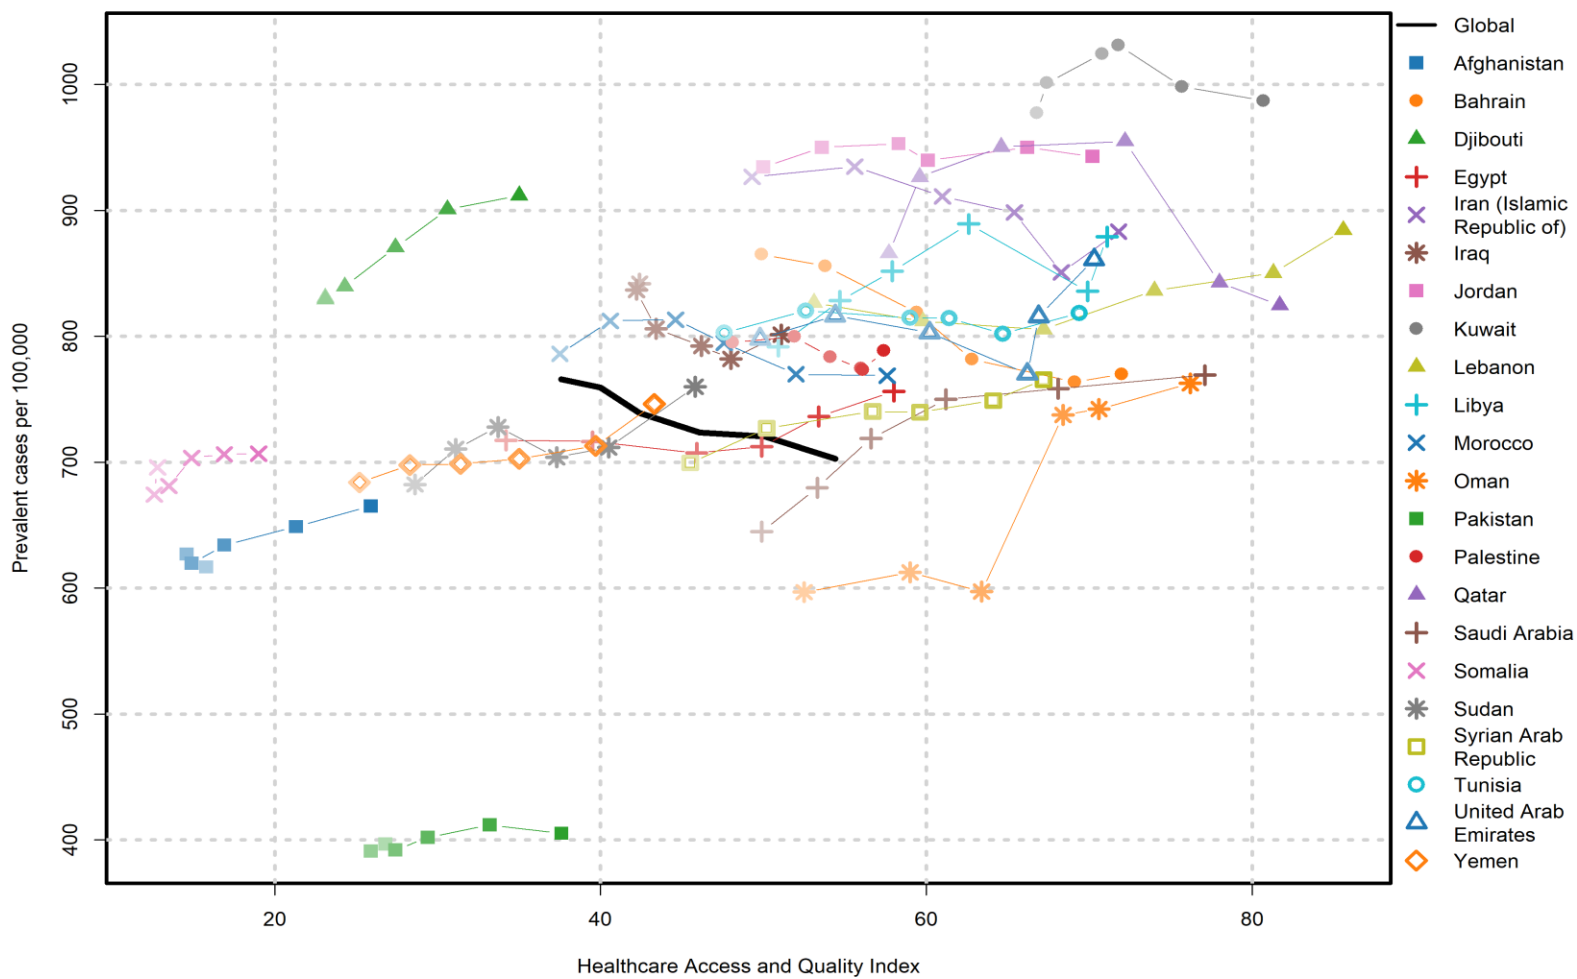

**Figure S6: Trends in age-standardised prevalence rate of heart failure for 22 EMR countries by HAQ Index in 1990,1995, 2000,2005,2010 and 2016.**

For each country, points from left to right illustrate estimates for each 5-year from 1990 and 2016.

HAQ= Healthcare Access and Quality. EMR=Eastern Mediterranean Region.

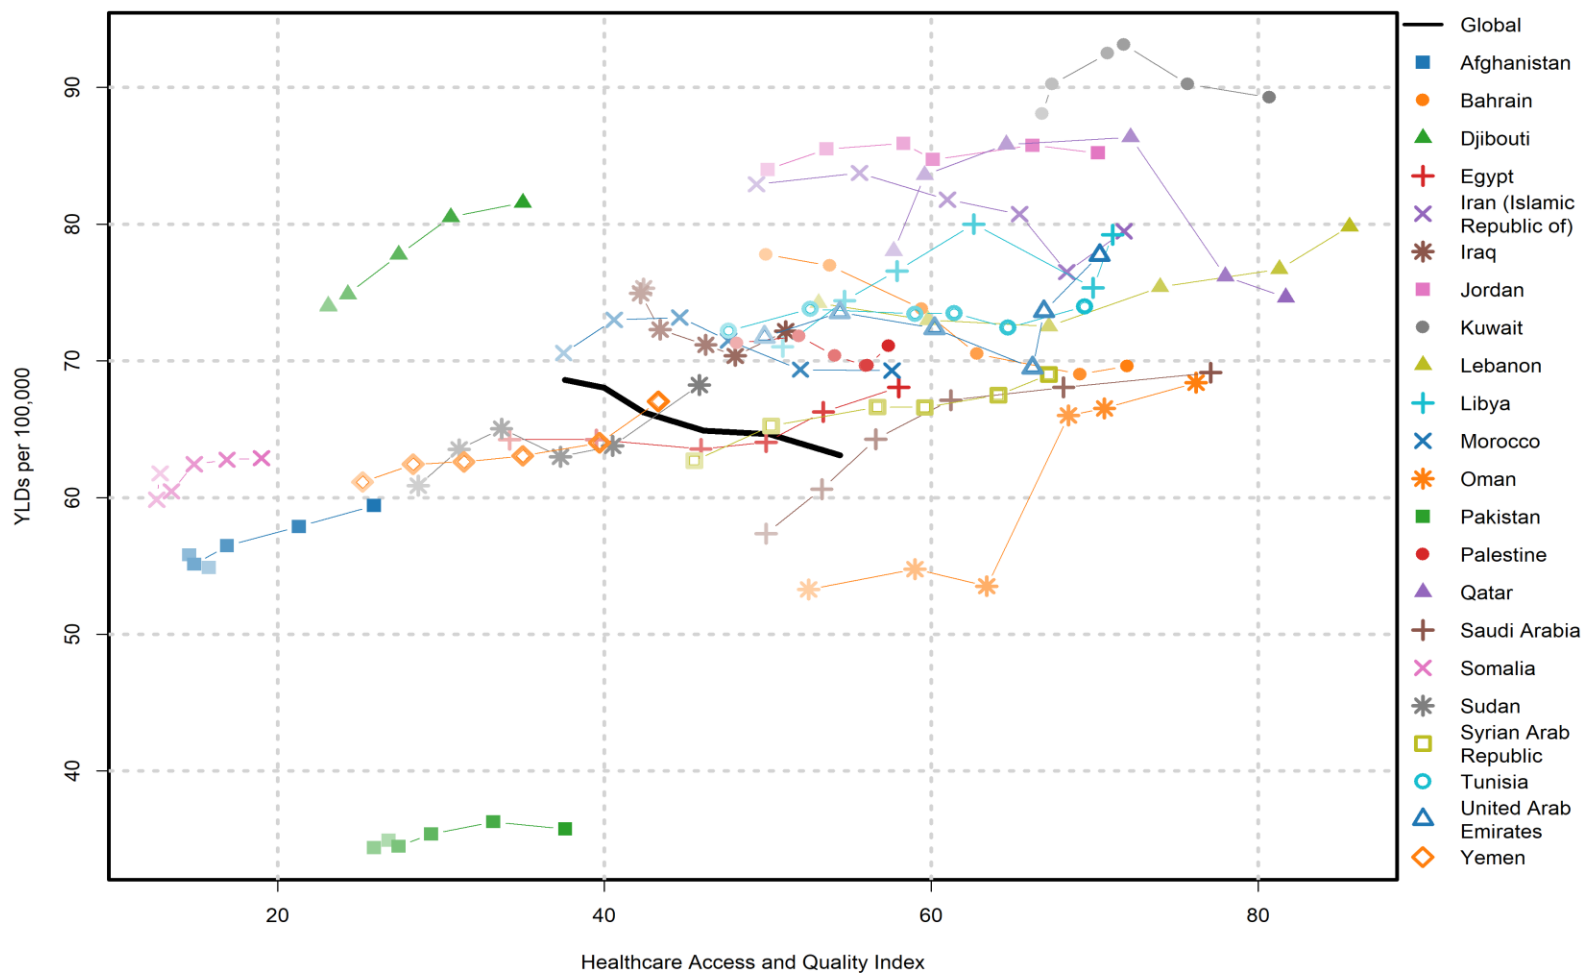

**Figure S7: Trends in age-standardised YLD rate of heart failure for 22 EMR countries by HAQ Index in 1990,1995, 2000,2005,2010 and 2016.**

For each country, points from left to right illustrate estimates for each 5-year from 1990 and 2016.

YLD= years lived with disability. HAQ= Healthcare Access and Quality. EMR=Eastern Mediterranean Region.



**Table S1: Age-standardised prevalence rate (per 100,000 persons) of heart failure for males in 1990,2005 and 2019, and their relative percentage change by EMR countries.**

|                            | Prevalence rate          |                          |                          | %Δ                 |                       |                       |
|----------------------------|--------------------------|--------------------------|--------------------------|--------------------|-----------------------|-----------------------|
|                            | 1990                     | 2005                     | 2019                     | 1990-2005          | 2005-2019             | 1990-2019             |
| Global                     | 864.25 (703.71-1048.41)  | 805.81 (669.21-969.47)   | 785.71 (649.52-944.9)    | -6.76(-6.92,-6.6)  | -2.49(-2.59,-2.39)    | -9.09(-9.27,-8.91)    |
| EMR                        | 749.25 (586.25-938.21)   | 786.25 (619.51-992.01)   | 822.27 (646.51-1044.66)  | 4.94(4.81,5.07)    | 4.58(4.45,4.71)       | 9.75(9.57,9.93)       |
| Afghanistan                | 745.51 (564.71-981.83)   | 775.05 (589.89-1033.18)  | 832.74 (634.13-1081.14)  | 3.96(3.84,4.08)    | 7.44(7.28,7.6)        | 11.7(11.5,11.9)       |
| Bahrain                    | 1016.54 (776.89-1303.93) | 920.59 (699.65-1188.91)  | 910.2 (696.5-1170.3)     | -9.44(-9.62,-9.26) | -1.13(-1.2,-1.06)     | -10.46(-10.65,-10.27) |
| Djibouti                   | 1046.49 (784.08-1388.42) | 1087.65 (817.2-1449.46)  | 1144.03 (861.69-1515.68) | 3.93(3.81,4.05)    | 5.18(5.04,5.32)       | 9.32(9.14,9.5)        |
| Egypt                      | 858.82 (618.52-1133.68)  | 836.29 (614.94-1140.4)   | 886.81 (648.24-1201.81)  | -2.62(-2.72,-2.52) | 6.04(5.89,6.19)       | 3.26(3.15,3.37)       |
| Iran (Islamic Republic of) | 1102.97 (869.11-1375.42) | 1059.45 (835.93-1321.91) | 1064.82 (843.01-1327.57) | -3.95(-4.07,-3.83) | 0.51(0.47,0.55)       | -3.46(-3.57,-3.35)    |
| Iraq                       | 990.21 (746.73-1277.31)  | 923.36 (698.61-1200.64)  | 941.82 (715.16-1230.5)   | -6.75(-6.91,-6.59) | 2(1.91,2.09)          | -4.89(-5.02,-4.76)    |
| Jordan                     | 1185.77 (897.83-1555.16) | 1163.46 (894.14-1511.08) | 1196.04 (922.7-1533.31)  | -1.88(-1.96,-1.8)  | 2.8(2.7,2.9)          | 0.87(0.81,0.93)       |
| Kuwait                     | 1118.83 (858.88-1441.45) | 1167.88 (899.89-1529.73) | 1140.24 (872.55-1471.22) | 4.38(4.25,4.51)    | -2.37(-2.46,-2.28)    | 1.91(1.83,1.99)       |
| Lebanon                    | 957.39 (733.89-1243.46)  | 967.29 (740.97-1262.2)   | 1046.42 (800.84-1342.95) | 1.03(0.97,1.09)    | 8.18(8.01,8.35)       | 9.3(9.12,9.48)        |
| Libya                      | 939.03 (732.7-1231.72)   | 1067.64 (818.52-1391.32) | 1067.29 (815.27-1391.25) | 13.7(13.49,13.91)  | -0.03(-0.04,-0.02)    | 13.66(13.45,13.87)    |
| Morocco                    | 967.78 (736.85-1243.71)  | 970.14 (736.26-1248.53)  | 953.03 (718.6-1249.18)   | 0.24(0.21,0.27)    | -1.76(-1.84,-1.68)    | -1.52(-1.6,-1.44)     |
| Oman                       | 690.66 (565.83-844.29)   | 851.59 (645.65-1093.95)  | 883.46 (683.02-1126.94)  | 23.3(23.04,23.56)  | 3.74(3.62,3.86)       | 27.92(27.64,28.2)     |
| Palestine                  | 961.64 (734.03-1235.97)  | 921.5 (706.3-1196.86)    | 953.75 (724.49-1235.23)  | -4.17(-4.29,-4.05) | 3.5(3.39,3.61)        | -0.82(-0.88,-0.76)    |
| Pakistan                   | 413.2 (331.09-514.74)    | 411.66 (333.23-515.05)   | 418.44 (338.22-522.13)   | -0.37(-0.41,-0.33) | 1.65(1.57,1.73)       | 1.27(1.2,1.34)        |
| Qatar                      | 1038.81 (851.67-1238.53) | 1121.26 (933.09-1335.05) | 935.79 (712.87-1191.11)  | 7.94(7.77,8.11)    | -16.54(-16.77,-16.31) | -9.92(-10.11,-9.73)   |
| Saudi Arabia               | 735.72 (558.04-964.83)   | 859.36 (655.06-1104.35)  | 885.4 (674.9-1136.69)    | 16.81(16.58,17.04) | 3.03(2.92,3.14)       | 20.34(20.09,20.59)    |
| Somalia                    | 887.49 (670.14-1172.75)  | 924.97 (693.83-1240.44)  | 948.74 (705.74-1279.51)  | 4.22(4.1,4.34)     | 2.57(2.47,2.67)       | 6.9(6.74,7.06)        |
| Sudan                      | 825.37 (624.94-1072.05)  | 838.43 (641.1-1081.95)   | 935.12 (718.35-1231.58)  | 1.58(1.5,1.66)     | 11.53(11.33,11.73)    | 13.3(13.09,13.51)     |
| Syrian Arab Republic       | 816.73 (622.18-1051.32)  | 851.19 (649.98-1082.77)  | 894.55 (683.78-1151.53)  | 4.22(4.1,4.34)     | 5.09(4.95,5.23)       | 9.53(9.35,9.71)       |
| Tunisia                    | 931.6 (697.22-1217.28)   | 947.8 (718.3-1234.38)    | 969.3 (740.13-1248.65)   | 1.74(1.66,1.82)    | 2.27(2.18,2.36)       | 4.05(3.93,4.17)       |
| United Arab Emirates       | 936.63 (724.04-1228.44)  | 880.04 (677.68-1149.13)  | 977.39 (737.32-1269.88)  | -6.04(-6.19,-5.89) | 11.06(10.87,11.25)    | 4.35(4.22,4.48)       |
| Yemen                      | 849.17 (649.24-1105.29)  | 845.39 (644.31-1109.06)  | 902.16 (689.59-1193.22)  | -0.45(-0.49,-0.41) | 6.72(6.56,6.88)       | 6.24(6.09,6.39)       |

EMR=Eastern Mediterranean Region.

**Table S2: Age-standardised prevalence rate (per 100,000 persons) of heart failure for females in 1990,2005 and 2019, and their relative percentage change by EMR countries.**

|                            | Prevalence rate        |                        |                        | %Δ                   |                      |                       |
|----------------------------|------------------------|------------------------|------------------------|----------------------|----------------------|-----------------------|
|                            | 1990                   | 2005                   | 2019                   | 1990-2005            | 2005-2019            | 1990-2019             |
| Global                     | 685.99 (561.61-834.72) | 653.37 (545.36-787.26) | 646.15 (537.36-783.01) | -4.76(-4.89,-4.63)   | -1.11(-1.17,-1.05)   | -5.81(-5.95,-5.67)    |
| EMR                        | 549.08 (433.77-693.95) | 565.94 (448.57-710.37) | 582.58 (459.9-729.57)  | 3.07(2.96,3.18)      | 2.94(2.84,3.04)      | 6.1(5.95,6.25)        |
| Afghanistan                | 474.52 (363.73-615.58) | 495.64 (381.8-648.28)  | 522.3 (400.24-677.49)  | 4.45(4.32,4.58)      | 5.38(5.24,5.52)      | 10.07(9.88,10.26)     |
| Bahrain                    | 694.71 (540.74-895.94) | 623.83 (482.88-803.04) | 604.47 (470.85-782.2)  | -10.2(-10.39,-10.01) | -3.1(-3.21,-2.99)    | -12.99(-13.2,-12.78)  |
| Djibouti                   | 643.02 (477.91-855.06) | 667.79 (499.35-892.17) | 692.48 (516.37-920.5)  | 3.85(3.73,3.97)      | 3.7(3.58,3.82)       | 7.69(7.52,7.86)       |
| Egypt                      | 579.3 (423.39-781.78)  | 573.18 (422.58-781.56) | 607.47 (451.32-825.35) | -1.06(-1.12,-1)      | 5.98(5.83,6.13)      | 4.86(4.73,4.99)       |
| Iran (Islamic Republic of) | 752.76 (599.75-935.82) | 723.14 (579.83-904.51) | 717.63 (574.01-894.31) | -3.93(-4.05,-3.81)   | -0.76(-0.81,-0.71)   | -4.67(-4.8,-4.54)     |
| Iraq                       | 702.07 (539.57-909.14) | 670.52 (509.25-859.44) | 683.94 (519.92-890.38) | -4.49(-4.62,-4.36)   | 2(1.91,2.09)         | -2.58(-2.68,-2.48)    |
| Jordan                     | 686.22(537.04-882.04)  | 692.62 (538.54-905.12) | 685.42 (530.86-888.29) | 0.93(0.87,0.99)      | -1.04(-1.1,-0.98)    | -0.12(-0.14,-0.1)     |
| Kuwait                     | 778 (599.11-1000.67)   | 793.67 (623-1028.86)   | 777.44 (608.33-998.35) | 2.01(1.92,2.1)       | -2.04(-2.13,-1.95)   | -0.07(-0.09,-0.05)    |
| Lebanon                    | 703.87 (542.21-905.29) | 708.48 (545.08-914.08) | 763.07 (591.02-993.42) | 0.65(0.6,0.7)        | 7.71(7.54,7.88)      | 8.41(8.24,8.58)       |
| Libya                      | 630.84 (483.24-808.01) | 701.13 (538.81-913.73) | 710.23 (544.86-921.31) | 11.14(10.94,11.34)   | 1.3(1.23,1.37)       | 12.58(12.37,12.79)    |
| Morocco                    | 612.1 (466.85-795.16)  | 624.73 (479.18-807.31) | 605.63 (464.01-788.64) | 2.06(1.97,2.15)      | -3.06(-3.17,-2.95)   | -1.06(-1.12,-1)       |
| Oman                       | 490.38 (396.71-613.93) | 597.79 (460.69-769.32) | 627.32 (481.96-805.35) | 21.9(21.64,22.16)    | 4.94(4.81,5.07)      | 27.93(27.65,28.21)    |
| Palestine                  | 657.01 (506.58-858.44) | 656.61 (506.26-860.82) | 669.97 (518.72-864.53) | -0.06(-0.08,-0.04)   | 2.03(1.94,2.12)      | 1.97(1.88,2.06)       |
| Pakistan                   | 376.54 (300.4-471.85)  | 391.48 (312.59-497.1)  | 391.55 (313.08-490.54) | 3.97(3.85,4.09)      | 0.02(0.01,0.03)      | 3.99(3.87,4.11)       |
| Qatar                      | 578.34 (460.91-720.71) | 578.55 (466.59-717.78) | 517.82 (407.46-667.64) | 0.04(0.03,0.05)      | -10.5(-10.69,-10.31) | -10.46(-10.65,-10.27) |
| Saudi Arabia               | 526.73 (410.4-692.67)  | 612.64 (475.21-779.62) | 622.5 (482.24-796.62)  | 16.31(16.08,16.54)   | 1.61(1.53,1.69)      | 18.18(17.94,18.42)    |
| Somalia                    | 542.44 (396.91-733.79) | 560.9 (420.46-751.23)  | 564.43 (417.27-760.67) | 3.4(3.29,3.51)       | 0.63(0.58,0.68)      | 4.05(3.93,4.17)       |
| Sudan                      | 528.91 (405.39-701.28) | 547.41 (424.51-698.65) | 610.26 (463.01-783.91) | 3.5(3.39,3.61)       | 11.48(11.28,11.68)   | 15.38(15.16,15.6)     |
| Syrian Arab Republic       | 569.9 (432.54-725.82)  | 603.37 (464.04-769.59) | 633.53 (484.32-807.03) | 5.87(5.72,6.02)      | 5(4.86,5.14)         | 11.17(10.97,11.37)    |
| Tunisia                    | 665.4 (516.32-860.29)  | 683.55 (528.3-878.53)  | 692.58 (542.41-893.55) | 2.73(2.63,2.83)      | 1.32(1.25,1.39)      | 4.08(3.96,4.2)        |
| United Arab Emirates       | 584.89 (457.61-751.23) | 566.34 (440.75-739.94) | 608.51 (466.41-795.5)  | -3.17(-3.28,-3.06)   | 7.45(7.29,7.61)      | 4.04(3.92,4.16)       |
| Yemen                      | 556.73 (432.8-734.82)  | 567.33 (433.68-741.16) | 602.97 (466.29-800.42) | 1.9(1.82,1.98)       | 6.28(6.13,6.43)      | 8.31(8.14,8.48)       |

EMR=Eastern Mediterranean Region.

**Table S3: Age-standardised YLD rate (per 100,000 persons) of heart failure for males in 1990, 2005 and 2019, and their relative percentage change by EMR countries.**

|                            | YLD rate              |                       |                       | %Δ                 |                      |                      |
|----------------------------|-----------------------|-----------------------|-----------------------|--------------------|----------------------|----------------------|
|                            | 1990                  | 2005                  | 2019                  | 1990-2005          | 2005-2019            | 1990-2019            |
| Global                     | 77.38 (50.15-111.98)  | 72.27 (46.98-103.67)  | 70.58 (45.81-101.35)  | -6.6(-6.75,-6.45)  | -2.34(-2.43,-2.25)   | -8.79(-8.97,-8.61)   |
| EMR                        | 67.01 (42.12-98.16)   | 70.52 (43.99-102.88)  | 73.98 (46.52-107.71)  | 5.24(5.1,5.38)     | 4.91(4.78,5.04)      | 10.4(10.21,10.59)    |
| Afghanistan                | 66.54 (41.53-100.17)  | 69.31 (43.89-102.9)   | 74.69 (46.85-111.76)  | 4.16(4.04,4.28)    | 7.76(7.59,7.93)      | 12.25(12.05,12.45)   |
| Bahrain                    | 91.57 (57.32-134.64)  | 83.11 (52.41-122.26)  | 82.35 (51.54-120)     | -9.24(-9.42,-9.06) | -0.91(-0.97,-0.85)   | -10.07(-10.26,-9.88) |
| Djibouti                   | 93.26 (57.34-137.11)  | 97.11 (61-144.16)     | 102.37 (62.65-152.8)  | 4.13(4.01,4.25)    | 5.42(5.28,5.56)      | 9.77(9.59,9.95)      |
| Egypt                      | 77.11 (47.15-117.59)  | 75.32 (44.99-115.43)  | 80.02 (48.47-120.86)  | -2.32(-2.41,-2.23) | 6.24(6.09,6.39)      | 3.77(3.65,3.89)      |
| Iran (Islamic Republic of) | 98.79 (62.8-143.36)   | 95.27 (60.03-138.1)   | 96.01 (60.03-139.48)  | -3.56(-3.67,-3.45) | 0.78(0.73,0.83)      | -2.81(-2.91,-2.71)   |
| Iraq                       | 88.8 (54.39-130.13)   | 83.08 (51.14-121.59)  | 85.11 (53.25-126.67)  | -6.44(-6.59,-6.29) | 2.44(2.34,2.54)      | -4.16(-4.28,-4.04)   |
| Jordan                     | 106.76 (66.42-157.86) | 105.06 (66.98-156.09) | 108.29 (68.72-158.17) | -1.59(-1.67,-1.51) | 3.07(2.96,3.18)      | 1.43(1.36,1.5)       |
| Kuwait                     | 100.8 (62.98-149.25)  | 105.51 (65.52-154.91) | 103.2 (65.31-152.55)  | 4.67(4.54,4.8)     | -2.19(-2.28,-2.1)    | 2.38(2.29,2.47)      |
| Lebanon                    | 86.13 (55.07-127.55)  | 87.31 (54.51-130.96)  | 94.63 (59.58-140.14)  | 1.37(1.3,1.44)     | 8.38(8.21,8.55)      | 9.87(9.69,10.05)     |
| Libya                      | 84.37 (53.11-121.5)   | 96.2 (60.03-140.35)   | 96.3 (59.51-141.71)   | 14.02(13.8,14.24)  | 0.1(0.08,0.12)       | 14.14(13.92,14.36)   |
| Morocco                    | 87.09 (54.2-129.14)   | 87.45 (54.77-130.22)  | 86.15 (52.54-125.5)   | 0.41(0.37,0.45)    | -1.49(-1.57,-1.41)   | -1.08(-1.14,-1.02)   |
| Oman                       | 61.75 (39.97-88.74)   | 76.32 (47.44-112.9)   | 79.48 (49.94-115.66)  | 23.6(23.34,23.86)  | 4.14(4.02,4.26)      | 28.71(28.43,28.99)   |
| Palestine                  | 86.48 (54.48-127.63)  | 83.02 (52.67-121.86)  | 86.2 (55.13-127.54)   | -4(-4.12,-3.88)    | 3.83(3.71,3.95)      | -0.32(-0.36,-0.28)   |
| Pakistan                   | 36.43 (23.03-52.77)   | 36.29 (23.36-52.85)   | 37.02 (23.56-54.61)   | -0.38(-0.42,-0.34) | 2.01(1.92,2.1)       | 1.62(1.54,1.7)       |
| Qatar                      | 93.68 (62.17-133.32)  | 101.43 (66.82-144.1)  | 84.8 (54.32-126.2)    | 8.27(8.1,8.44)     | -16.4(-16.63,-16.17) | -9.48(-9.66,-9.3)    |
| Saudi Arabia               | 65.64 (41.02-97.42)   | 77.04 (48.41-113.3)   | 79.8 (49.24-115.77)   | 17.37(17.14,17.6)  | 3.58(3.46,3.7)       | 21.57(21.32,21.82)   |
| Somalia                    | 78.82 (47.37-117.56)  | 82.18 (51.54-120.74)  | 84.43 (52.01-126.46)  | 4.26(4.13,4.39)    | 2.74(2.64,2.84)      | 7.12(6.96,7.28)      |
| Sudan                      | 73.83 (45.54-109.57)  | 75.17 (46.99-111.89)  | 84.1 (52.16-124.62)   | 1.81(1.73,1.89)    | 11.88(11.68,12.08)   | 13.91(13.7,14.12)    |
| Syrian Arab Republic       | 73.36 (46.27-107.48)  | 76.73 (48.04-113.93)  | 80.76 (50.56-119.4)   | 4.59(4.46,4.72)    | 5.25(5.11,5.39)      | 10.09(9.9,10.28)     |
| Tunisia                    | 83.82 (50.99-123.44)  | 85.56 (53.42-126.32)  | 87.67 (54.92-129.1)   | 2.08(1.99,2.17)    | 2.47(2.37,2.57)      | 4.59(4.46,4.72)      |
| United Arab Emirates       | 84.32 (53.69-124.89)  | 79.46 (50.41-117.88)  | 88.4 (55.08-131.2)    | -5.76(-5.9,-5.62)  | 11.25(11.05,11.45)   | 4.84(4.71,4.97)      |
| Yemen                      | 76.06 (47.01-111.33)  | 76.04 (46.59-114.36)  | 81.23 (50.34-120.08)  | -0.03(-0.04,-0.02) | 6.83(6.67,6.99)      | 6.8(6.64,6.96)       |

YLD= years lived with disability. EMR=Eastern Mediterranean Region.

**Table S4: Age-standardised YLD rate (per 100,000 persons) of heart failure for females in 1990,2005 and 2019, and their relative percentage change by EMR countries.**

|                            | YLD rate            |                      |                      | %Δ                 |                      |                       |
|----------------------------|---------------------|----------------------|----------------------|--------------------|----------------------|-----------------------|
|                            | 1990                | 2005                 | 2019                 | 1990-2005          | 2005-2019            | 1990-2019             |
| Global                     | 61.44 (39.63-88.87) | 58.58 (38.39-84.17)  | 57.99 (37.72-83.46)  | -4.65(-4.78,-4.52) | -1.01(-1.07,-0.95)   | -5.62(-5.76,-5.48)    |
| EMR                        | 48.83 (30.8-71.3)   | 50.52 (31.87-73.5)   | 52.21 (33.02-76.47)  | 3.46(3.35,3.57)    | 3.35(3.24,3.46)      | 6.92(6.76,7.08)       |
| Afghanistan                | 41.99 (26.51-61.78) | 43.88 (27.82-64.74)  | 46.49 (29.46-68.94)  | 4.5(4.37,4.63)     | 5.95(5.8,6.1)        | 10.72(10.53,10.91)    |
| Bahrain                    | 62.23 (39.19-90.82) | 56.14 (34.88-81.96)  | 54.54 (34.83-80.36)  | -9.79(-9.97,-9.61) | -2.85(-2.95,-2.75)   | -12.36(-12.56,-12.16) |
| Djibouti                   | 57.25 (35.47-85.78) | 59.55 (36.58-90.84)  | 61.98 (38.16-92.68)  | 4.02(3.9,4.14)     | 4.08(3.96,4.2)       | 8.26(8.09,8.43)       |
| Egypt                      | 51.68 (31.43-77.74) | 51.4 (31.08-78.74)   | 54.64 (33.54-84.37)  | -0.54(-0.59,-0.49) | 6.3(6.15,6.45)       | 5.73(5.59,5.87)       |
| Iran (Islamic Republic of) | 67.25 (43.07-97.23) | 64.91 (41.31-94.16)  | 64.59 (41.07-93.36)  | -3.48(-3.59,-3.37) | -0.49(-0.53,-0.45)   | -3.96(-4.08,-3.84)    |
| Iraq                       | 62.58 (39.26-91.57) | 60.07 (37.52-89.3)   | 61.53 (38.51-91.01)  | -4.01(-4.13,-3.89) | 2.43(2.33,2.53)      | -1.68(-1.76,-1.6)     |
| Jordan                     | 61.48 (38.76-90.71) | 62.29 (39.18-91.5)   | 61.86 (39.5-90.47)   | 1.32(1.25,1.39)    | -0.69(-0.74,-0.64)   | 0.62(0.57,0.67)       |
| Kuwait                     | 70 (43.61-103.34)   | 71.61 (45.48-105.06) | 70.29 (44.11-104.49) | 2.3(2.21,2.39)     | -1.84(-1.92,-1.76)   | 0.41(0.37,0.45)       |
| Lebanon                    | 63.03 (39.76-91.93) | 63.79 (39.13-92.76)  | 68.81 (42.93-101.88) | 1.21(1.14,1.28)    | 7.87(7.7,8.04)       | 9.17(8.99,9.35)       |
| Libya                      | 56.41 (36.36-82.13) | 62.93 (39.71-92.21)  | 63.83 (40.51-94.21)  | 11.56(11.36,11.76) | 1.43(1.36,1.5)       | 13.15(12.94,13.36)    |
| Morocco                    | 54.77 (34.52-80.59) | 56.04 (34.88-82.17)  | 54.47 (34.54-80.08)  | 2.32(2.23,2.41)    | -2.8(-2.9,-2.7)      | -0.55(-0.6,-0.5)      |
| Oman                       | 43.61 (27.83-62.32) | 53.33 (33.24-77.48)  | 56.15 (35.06-81.23)  | 22.29(22.03,22.55) | 5.29(5.15,5.43)      | 28.75(28.47,29.03)    |
| Palestine                  | 58.7 (36.31-85.66)  | 58.83 (37.27-85.55)  | 60.33 (38.41-88.3)   | 0.22(0.19,0.25)    | 2.55(2.45,2.65)      | 2.78(2.68,2.88)       |
| Pakistan                   | 33.05 (21.13-47.92) | 34.37 (22.31-49.96)  | 34.56 (21.9-51)      | 3.99(3.87,4.11)    | 0.55(0.5,0.6)        | 4.57(4.44,4.7)        |
| Qatar                      | 51.84 (32.81-73.94) | 52.16 (33.12-74.27)  | 46.78 (29.6-68.26)   | 0.62(0.57,0.67)    | -10.31(-10.5,-10.12) | -9.76(-9.94,-9.58)    |
| Saudi Arabia               | 46.58 (30.34-68.8)  | 54.64 (34.84-79.15)  | 55.9 (34.69-82.79)   | 17.3(17.07,17.53)  | 2.31(2.22,2.4)       | 20.01(19.76,20.26)    |
| Somalia                    | 48.07 (29.51-72.42) | 49.71 (30.77-73.7)   | 50.12 (30.61-75.3)   | 3.41(3.3,3.52)     | 0.82(0.76,0.88)      | 4.26(4.13,4.39)       |
| Sudan                      | 46.97 (28.82-68.6)  | 48.81 (30.77-71.4)   | 54.66 (33.95-80.36)  | 3.92(3.8,4.04)     | 11.99(11.79,12.19)   | 16.37(16.14,16.6)     |
| Syrian Arab Republic       | 50.93 (31.62-75.67) | 54.22 (33.45-80.6)   | 57.04 (36.02-84.65)  | 6.46(6.31,6.61)    | 5.2(5.06,5.34)       | 12(11.8,12.2)         |
| Tunisia                    | 59.79 (37.43-88.79) | 61.62 (39.24-90.98)  | 62.57 (39.64-92.51)  | 3.06(2.95,3.17)    | 1.54(1.46,1.62)      | 4.65(4.52,4.78)       |
| United Arab Emirates       | 52.38 (33.21-76.89) | 50.99 (32.63-74.39)  | 54.91 (35.16-80.82)  | -2.65(-2.75,-2.55) | 7.69(7.52,7.86)      | 4.83(4.7,4.96)        |
| Yemen                      | 49.6 (31.11-74.01)  | 50.72 (31.81-74.22)  | 53.95 (33.63-79.62)  | 2.26(2.17,2.35)    | 6.37(6.22,6.52)      | 8.77(8.59,8.95)       |

YLD= years lived with disability. EMR=Eastern Mediterranean Region.

**Table S5. Age-standardised prevalence rate (per 100,000 persons) of heart failure due to each underlying cause for males in 1990 and 2019 by EMR countries.**

|                            | Ischemic heart disease | Hypertensive heart disease | Non-rheumatic valvular heart disease | Rheumatic heart disease | Alcoholic cardiomyopathy |
|----------------------------|------------------------|----------------------------|--------------------------------------|-------------------------|--------------------------|
| <b>1990</b>                |                        |                            |                                      |                         |                          |
| Global                     | 366.89 (271.04-474.04) | 238.87 (172.47-324.37)     | 33.17 (21.94-48)                     | 19.49 (15.19-24.8)      | 19.16 (14.62-25.27)      |
| EMR                        | 367.65 (267.13-485.93) | 268.44 (193.92-372.64)     | 3.93 (2.54-5.95)                     | 18.48 (14.2-24.09)      | 2.03 (1.46-2.84)         |
| Afghanistan                | 286.67 (205.13-387.88) | 388.91 (279.62-538.84)     | 3.49 (2.18-5.42)                     | 14.72 (10.79-19.8)      | 1.27 (0.91-1.71)         |
| Bahrain                    | 704.09 (520.4-922.02)  | 115.3 (82.38-159.36)       | 7.99 (4.86-12.55)                    | 9.34 (6.86-12.24)       | 6.55 (4.79-8.72)         |
| Djibouti                   | 233.06 (151.03-345.42) | 356.66 (240.21-513.07)     | 2.22 (1.39-3.5)                      | 1.2 (0.73-1.87)         | 2.27 (1.43-3.37)         |
| Egypt                      | 477.51 (317.42-676.28) | 288.26 (185.74-436.14)     | 5.32 (3.4-8.24)                      | 8.54 (5.68-12.43)       | 3.17 (2.03-5.09)         |
| Iran (Islamic Republic of) | 519.75 (380.89-682.87) | 470.53 (334.78-640.14)     | 4.22 (2.78-6.14)                     | 15.66 (11.7-20.99)      | 3.43 (2.47-4.65)         |
| Iraq                       | 598.97 (426.98-790.01) | 257.5 (183.45-358.53)      | 6.42 (4.22-9.58)                     | 15.33 (11.28-20.18)     | 0.71 (0.55-0.92)         |
| Jordan                     | 475.32 (336.52-636.28) | 628.41 (456.07-858.1)      | 4.63 (2.76-7.47)                     | 5.7 (4.23-7.51)         | 1.17 (0.87-1.55)         |
| Kuwait                     | 517.23 (378.43-690.68) | 522.73 (370.17-717.58)     | 10.76 (6.56-16.47)                   | 5.78 (4.28-7.52)        | 1.29 (0.96-1.71)         |
| Lebanon                    | 351.48 (250.96-475.08) | 498.93 (359.37-680.62)     | 5.04 (3.2-7.72)                      | 9.7 (7.06-12.78)        | 4.59 (3.25-6.38)         |
| Libya                      | 429.17 (307.6-581.82)  | 417.19 (302.85-580.22)     | 6.45 (4.04-9.9)                      | 7.12 (5.20-9.59)        | 2.74 (1.97-3.82)         |
| Morocco                    | 476.66 (349.16-634.77) | 405.44 (290.61-559.19)     | 4.13 (2.61-6.5)                      | 13.25 (9.70-17.42)      | 2.6 (1.87-3.63)          |
| Oman                       | 442.49 (348.53-547.95) | 175.93 (134.95-230.25)     | 6.37 (4.01-10.15)                    | 2.66 (2.04-3.40)        | 1.26 (0.94-1.65)         |
| Palestine                  | 491.73 (356.81-663.48) | 361.36 (260-500.41)        | 3.61 (2.17-5.86)                     | 5.65 (4.19-7.33)        | 0.78 (0.59-1)            |
| Pakistan                   | 173.89 (124.84-234.78) | 119.05 (82.73-170.22)      | 2.2 (1.43-3.29)                      | 31.13 (23.69-40.72)     | 0.86 (0.58-1.23)         |
| Qatar                      | 757.36 (589.26-925.22) | 104.96 (79.73-137.46)      | 18.86 (11.28-29.75)                  | 12.81 (9.99-16.35)      | 4.41 (3.45-5.59)         |
| Saudi Arabia               | 515.48 (372.67-695.26) | 64.83 (46.69-89.48)        | 6.43 (4.05-10.28)                    | 8.36 (6.12-11)          | 0.78 (0.57-1.08)         |
| Somalia                    | 199.91 (129.4-298.11)  | 296.4 (200.85-422.25)      | 1.21 (0.79-1.85)                     | 0.98 (0.60-1.53)        | 2.33 (1.47-3.55)         |
| Sudan                      | 367.32 (264.29-500.86) | 378.41 (269.86-523.69)     | 3.53 (2.16-5.59)                     | 12.06 (8.91-16.14)      | 1.88 (1.33-2.64)         |
| Syrian Arab Republic       | 605.44 (441.63-791.43) | 108.49 (77.97-148.37)      | 8.11 (5.81-11.66)                    | 21.06 (15.47-28.03)     | 2.68 (1.9-3.75)          |
| Tunisia                    | 454.89 (323.05-603.28) | 386.81 (276.66-537.18)     | 4.41 (2.78-6.83)                     | 8.62 (6.24-11.4)        | 2.5 (1.79-3.43)          |
| United Arab Emirates       | 367.19 (260.77-507.94) | 458.31 (330.3-621.11)      | 10.24 (6.36-16.37)                   | 17.66 (12.78-23.85)     | 2.53 (1.84-3.55)         |
| Yemen                      | 362.26 (258.02-496.02) | 407.74 (289.59-569.67)     | 3.81 (2.36-6.05)                     | 14.31 (10.47-19.43)     | 1.6 (1.13-2.22)          |
| <b>2019</b>                |                        |                            |                                      |                         |                          |
| Global                     | 316.12 (236.51-411.4)  | 241.25 (176.26-324.85)     | 28.05 (18.36-41.03)                  | 20.6 (15.98-26.12)      | 13.33 (10.32-17.25)      |
| EMR                        | 410.74 (298.75-539.64) | 299.9 (215.31-414.45)      | 4.27 (2.77-6.46)                     | 17.65 (13.35-23.14)     | 2.19 (1.59-3.04)         |
| Afghanistan                | 335.14 (240.33-453.92) | 422.92 (306.05-588.35)     | 3.36 (2.08-5.19)                     | 16.03 (11.72-21.26)     | 1.4 (1.01-1.88)          |
| Bahrain                    | 611.12 (446.82-819.78) | 109.29 (78.93-149.41)      | 8.1 (4.98-12.22)                     | 8.95 (6.57-11.79)       | 6.43 (4.74-8.45)         |
| Djibouti                   | 272.94 (177.23-404.76) | 376.11 (253.95-536.45)     | 1.86 (1.21-2.86)                     | 1.32 (0.83-2.06)        | 2.52 (1.61-3.68)         |
| Egypt                      | 487.1 (326.46-691.64)  | 296.45 (189.17-443.97)     | 5.85 (3.77-9.11)                     | 9.07 (6-13.15)          | 3.59 (2.25-5.64)         |
| Iran (Islamic Republic of) | 494.88 (363.66-649.43) | 456.73 (326.82-623.14)     | 3.74 (2.45-5.45)                     | 16.13 (12.13-21.55)     | 3.49 (2.52-4.73)         |
| Iraq                       | 557.38 (401.24-746.17) | 253.12 (182.98-353.41)     | 5.33 (3.53-7.97)                     | 15.57 (11.48-20.34)     | 0.71 (0.55-0.90)         |
| Jordan                     | 453.76 (324.91-606.47) | 657.07 (477.4-879.74)      | 5.34 (3.26-8.13)                     | 5.95 (4.41-7.75)        | 1.21 (0.89-1.59)         |
| Kuwait                     | 540.38 (389.43-719.41) | 519.93 (368.74-715.42)     | 9.36 (5.61-14.1)                     | 5.77 (4.27-7.58)        | 1.34 (0.99-1.78)         |
| Lebanon                    | 404.57 (286.89-556.04) | 526.53 (374.91-724.2)      | 3.71 (2.31-5.69)                     | 10.55 (7.76-13.84)      | 5.07 (3.60-7)            |
| Libya                      | 527.61 (381-707)       | 436.98 (314.35-604.58)     | 5.21 (3.24-8.08)                     | 7.77 (5.61-10.28)       | 3.20 (2.26-4.45)         |
| Morocco                    | 456.34 (327.25-618.69) | 408.56 (290.28-570.75)     | 4.4 (2.8-6.84)                       | 13.36 (9.8-17.57)       | 2.68 (1.93-3.70)         |
| Oman                       | 592.96 (442.24-766.88) | 209.51 (149.21-289.07)     | 4.89 (3.08-7.41)                     | 3.24 (2.35-4.32)        | 1.31 (0.93-1.86)         |
| Palestine                  | 486.23 (353.12-654.1)  | 359.43 (252.87-503.4)      | 3.65 (2.21-5.93)                     | 5.7 (4.24-7.4)          | 0.8 (0.61-1.04)          |

|                      |                        |                        |                    |                     |                  |
|----------------------|------------------------|------------------------|--------------------|---------------------|------------------|
| Pakistan             | 180.8 (129.67-244.69)  | 119.62 (83.3-169.95)   | 2.32 (1.51-3.47)   | 32.22 (24.33-42.32) | 0.90 (0.62-1.28) |
| Qatar                | 681.41 (497.94-895.73) | 98.34 (70.8-133.99)    | 13.1 (7.99-19.65)  | 10.53 (7.75-13.49)  | 3.78 (2.79-4.95) |
| Saudi Arabia         | 635.46 (464.84-832.12) | 70.69 (50.32-98.06)    | 7.53 (4.61-11.45)  | 9.28 (6.78-12.23)   | 0.93 (0.67-1.28) |
| Somalia              | 227.53 (147.72-333.55) | 306.82 (205.74-440.37) | 0.98 (0.65-1.47)   | 1.04 (0.65-1.64)    | 2.53 (1.59-3.75) |
| Sudan                | 438.34 (311.6-595.76)  | 411.82 (294.17-573.47) | 3.8 (2.4-5.92)     | 13.66 (10.13-18.32) | 2.04 (1.44-2.86) |
| Syrian Arab Republic | 672.28 (496.71-878.84) | 113.83 (81.08-159.84)  | 6.5 (4.87-8.79)    | 22.61 (16.68-30.1)  | 3.03 (2.13-4.28) |
| Tunisia              | 479.58 (345.36-646.41) | 394.15 (282.19-547.67) | 3.93 (2.50-5.93)   | 8.96 (6.63-11.81)   | 2.74 (1.98-3.78) |
| United Arab Emirates | 394.82 (280.23-531.91) | 465.17 (329.87-638.01) | 13.36 (8.23-20.45) | 17.39 (12.4-23.65)  | 2.42 (1.72-3.32) |
| Yemen                | 397.45 (286.15-535.64) | 424.1 (302.33-587.25)  | 3.56 (2.26-5.55)   | 15.18 (11.11-20.05) | 1.69 (1.21-2.32) |

EMR=Eastern Mediterranean Region.

**Table S6. Age-standardised prevalence rate (per 100,000 persons) of heart failure due to each underlying cause for females in 1990 and 2019 by EMR countries.**

|                            | Ischemic heart disease | Hypertensive heart disease | Non-rheumatic valvular heart disease | Rheumatic heart disease | Alcoholic cardiomyopathy |
|----------------------------|------------------------|----------------------------|--------------------------------------|-------------------------|--------------------------|
| <b>1990</b>                |                        |                            |                                      |                         |                          |
| Global                     | 257.86 (189.94-335.7)  | 202.19 (147.16-277.09)     | 47.42 (31.42-68.53)                  | 28.87 (22.15-37.07)     | 6.86 (5.19-9.05)         |
| EMR                        | 222.48 (161.19-298.87) | 245.54 (178.54-333.47)     | 5.23 (3.50-7.88)                     | 22.1 (16.63-29.04)      | 1.17 (0.84-1.62)         |
| Afghanistan                | 153.86 (109-206.48)    | 271.23 (196.05-371.53)     | 5.27 (3.30-8.28)                     | 13.26 (9.60-17.92)      | 1.68 (1.15-2.32)         |
| Bahrain                    | 358.79 (258-488.11)    | 206.38 (148.01-286.08)     | 11.03 (7-17.43)                      | 14.17 (10.56-19.05)     | 2.99 (2.23-4.03)         |
| Djibouti                   | 107.26 (68.92-159.44)  | 251.48 (164.92-357.39)     | 2.38 (1.54-3.65)                     | 3.63 (2.35-5.53)        | 1.05 (0.67-1.53)         |
| Egypt                      | 256.86 (169.42-377.81) | 254.38 (169.11-369.35)     | 6.70 (4.37-10.32)                    | 9.19 (6.13-13.43)       | 1.68 (1.05-2.58)         |
| Iran (Islamic Republic of) | 297.89 (219.77-395.42) | 371.82 (271.47-491.78)     | 6.01 (4-8.72)                        | 19.09 (13.97-26.14)     | 1.05 (0.79-1.37)         |
| Iraq                       | 368.18 (266.4-496.11)  | 247.92 (178.07-346.24)     | 8.6 (5.55-13.49)                     | 15.23 (11.13-20.32)     | 0.75 (0.55-1.05)         |
| Jordan                     | 178.87 (131.26-238.3)  | 449.18 (332.42-599.39)     | 6.09 (3.76-9.61)                     | 5.62 (4.07-7.52)        | 0.37 (0.27-0.48)         |
| Kuwait                     | 205.12 (145.86-277.77) | 502.97 (368.14-665.77)     | 8.21 (5.14-12.62)                    | 7.44 (5.41-9.91)        | 0.7 (0.50-0.94)          |
| Lebanon                    | 305.02 (218.09-407.26) | 328.86 (235.29-449.72)     | 6.75 (4.41-10.33)                    | 7.56 (5.54-10.14)       | 1.06 (0.78-1.45)         |
| Libya                      | 245.13 (174.93-329.14) | 321.01 (232.96-433.71)     | 7.55 (4.76-11.80)                    | 9.20 (6.80-12.12)       | 0.91 (0.66-1.28)         |
| Morocco                    | 247.71 (177.2-335.84)  | 302.85 (218.64-415.13)     | 6.03 (3.82-9.23)                     | 14.12 (10.29-18.86)     | 1.75 (1.22-2.53)         |
| Oman                       | 244.19 (183.76-317.32) | 189.29 (140-250.86)        | 8.69 (5.52-13.78)                    | 3.35 (2.52-4.34)        | 0.43 (0.32-0.58)         |
| Palestine                  | 264.31 (188.14-357.01) | 315.5 (230.89-432.88)      | 5.05 (2.95-8.27)                     | 8.55 (6.19-11.41)       | 1.41 (1.02-1.93)         |
| Pakistan                   | 131.77 (92.08-183.99)  | 151.79 (105.2-212.57)      | 1.73 (1.15-2.54)                     | 42.94 (31.94-56.75)     | 0.45 (0.30-0.67)         |
| Qatar                      | 344.29 (257.47-449.57) | 135.62 (101.26-185.86)     | 13.74 (8.51-21.75)                   | 9.79 (7.41-12.84)       | 1.8 (1.37-2.34)          |
| Saudi Arabia               | 289.56 (207.82-394.4)  | 119.15 (84.41-161.23)      | 10.75 (6.68-17.39)                   | 11.17 (8.13-15.13)      | 1.98 (1.39-2.76)         |
| Somalia                    | 92.68 (59.92-139.58)   | 212.58 (140.21-313.25)     | 1.54 (1-2.28)                        | 3.01 (1.91-4.72)        | 3.13 (1.96-4.68)         |
| Sudan                      | 196.57 (138.89-268.14) | 279.44 (200.06-385.19)     | 5.22 (3.32-8.07)                     | 12.02 (8.83-16.34)      | 2.1 (1.43-3.02)          |
| Syrian Arab Republic       | 380.3 (277.88-503.5)   | 103.5 (74.44-144.48)       | 14.35 (10.86-19.60)                  | 21.26 (15.44-28.36)     | 1.31 (0.89-1.83)         |
| Tunisia                    | 243.51 (173.3-330.4)   | 353.84 (255.58-470.45)     | 6.20 (3.97-9.63)                     | 10.52 (7.7-14.02)       | 0.92 (0.67-1.26)         |
| United Arab Emirates       | 184.87 (131.34-255.36) | 322.03 (233.78-436.37)     | 11.20 (7.16-17.49)                   | 13.76 (10.15-18.56)     | 1.17 (0.84-1.58)         |
| Yemen                      | 188.32 (132.6-262.49)  | 311.19 (229.7-425.3)       | 5.53 (3.50-8.48)                     | 13.13 (9.55-17.65)      | 1.40 (0.99-2)            |
| <b>2019</b>                |                        |                            |                                      |                         |                          |
| Global                     | 222.48 (163.75-291.22) | 224.60 (162.85-302.06)     | 33.67 (22.07-49.98)                  | 31.59 (24.49-40.34)     | 4.13 (3.18-5.36)         |
| EMR                        | 238 (172.13-321.01)    | 262.32 (192.72-354.69)     | 5.31 (3.55-7.76)                     | 22 (16.69-28.86)        | 1.20 (0.86-1.65)         |
| Afghanistan                | 173.22 (123.05-235.32) | 297.18 (214.17-403.54)     | 5.21 (3.24-8.21)                     | 14.58 (10.62-19.64)     | 1.78 (1.21-2.46)         |
| Bahrain                    | 284.57 (201.77-386.43) | 197.82 (142.19-272.88)     | 9.18 (5.87-13.93)                    | 13.53 (9.96-18.06)      | 2.91 (2.14-3.94)         |

|                            |                        |                        |                     |                     |                  |
|----------------------------|------------------------|------------------------|---------------------|---------------------|------------------|
| Djibouti                   | 121.68 (75.7-180.89)   | 261.76 (172.65-379.83) | 1.96 (1.30-2.93)    | 4 (2.59-6.11)       | 1.14 (0.71-1.64) |
| Egypt                      | 267.05 (177.17-383.68) | 264.80 (174.45-391.49) | 7.36 (4.83-11.11)   | 10.01 (6.73-14.65)  | 1.89 (1.20-3.01) |
| Iran (Islamic Republic of) | 279.44 (206.22-370.49) | 356.20 (261.62-470.09) | 5.51 (3.70-7.91)    | 18.99 (14.01-25.95) | 1.06 (0.80-1.38) |
| Iraq                       | 353.17 (248.66-479.31) | 247.71 (177.04-345.01) | 7.26 (4.79-11.08)   | 15.64 (11.49-21.07) | 0.72 (0.52-0.99) |
| Jordan                     | 166.91 (120.16-223.32) | 459.58 (340.5-617.66)  | 5.70 (3.46-8.93)    | 5.77 (4.21-7.67)    | 0.39 (0.29-0.51) |
| Kuwait                     | 202.97 (147.23-274.18) | 503.70 (377.11-665.78) | 7.4 (4.59-11.06)    | 7.51 (5.62-9.96)    | 0.71 (0.53-0.95) |
| Lebanon                    | 341.99 (245.18-461.36) | 349.02 (249.92-479.11) | 5.04 (3.34-7.52)    | 8.11 (5.98-10.66)   | 1.15 (0.84-1.54) |
| Libya                      | 300.23 (213.37-414.44) | 339.69 (243.76-465.65) | 6.70 (4.33-10.25)   | 9.93 (7.27-13.38)   | 1.06 (0.76-1.47) |
| Morocco                    | 235.72 (167.24-318.97) | 306.51 (222.12-418.78) | 6.46 (4.17-9.95)    | 14.29 (10.52-18.96) | 1.85 (1.28-2.59) |
| Oman                       | 329.38 (237.13-434.89) | 240.38 (173.31-328.45) | 6.58 (4.29-9.92)    | 4.57 (3.35-6.1)     | 0.34 (0.24-0.47) |
| Palestine                  | 272.09 (195.26-364.54) | 318.83 (231.91-437)    | 5.24 (3.09-8.47)    | 8.79 (6.4-11.83)    | 1.49 (1.09-2)    |
| Pakistan                   | 140.85 (97.92-195.51)  | 157.35 (108.77-227.14) | 1.77 (1.17-2.60)    | 45.05 (33.42-59)    | 0.47 (0.31-0.68) |
| Qatar                      | 295.99 (215.01-396.08) | 129.66 (93.02-179)     | 11.92 (7.36-18.13)  | 8.91 (6.55-11.87)   | 1.68 (1.26-2.23) |
| Saudi Arabia               | 361.6 (258.06-491.21)  | 130.51 (94.79-178.63)  | 9.77 (6.05-15.13)   | 12.3 (8.84-16.66)   | 2.36 (1.65-3.33) |
| Somalia                    | 101.91 (65.96-152.41)  | 214.37 (143.71-315.01) | 1.22 (0.83-1.83)    | 3.19 (2.02-4.89)    | 3.29 (2.10-4.85) |
| Sudan                      | 245.73 (172.61-330.41) | 307.59 (221.37-419.19) | 5.77 (3.68-8.98)    | 13.74 (9.97-18.33)  | 2.30 (1.56-3.25) |
| Syrian Arab Republic       | 432.53 (315.48-565.04) | 110.75 (79.11-154.34)  | 12.97 (10.17-16.86) | 23.04 (16.74-31.03) | 1.50 (1.05-2.11) |
| Tunisia                    | 257 (186.18-342.4)     | 363.62 (267.42-494.66) | 5.69 (3.66-8.62)    | 10.89 (7.95-14.36)  | 1.05 (0.78-1.38) |
| United Arab Emirates       | 200.95 (142.03-270.21) | 330.07 (237.55-452.35) | 11.64 (7.46-17.80)  | 13.67 (10.01-18.89) | 1.06 (0.76-1.45) |
| Yemen                      | 215.44 (151.46-296.3)  | 329.42 (241.37-446.61) | 5.34 (3.40-8.20)    | 14.13 (10.30-18.97) | 1.50 (1.04-2.14) |

EMR=Eastern Mediterranean Region.

**Table S7. Age-standardised YLD rate (per 100,000 persons) of heart failure due to each underlying cause for males in 1990 and 2019 by EMR countries.**

|                            | Ischemic heart disease | Hypertensive heart disease | Non-rheumatic valvular heart disease | Rheumatic heart disease | Alcoholic cardiomyopathy |
|----------------------------|------------------------|----------------------------|--------------------------------------|-------------------------|--------------------------|
| <b>1990</b>                |                        |                            |                                      |                         |                          |
| Global                     | 32.94 (19.97-49.63)    | 21.41 (12.72-33.15)        | 2.99 (1.70-5.04)                     | 1.77 (1.11-2.63)        | 1.75 (1.09-2.58)         |
| EMR                        | 32.84 (19.89-50.07)    | 24.01 (14.14-37.55)        | 0.36 (0.20-0.62)                     | 1.67 (1.04-2.47)        | 0.19 (0.11-0.28)         |
| Afghanistan                | 25.55 (15.12-39.57)    | 34.67 (21.05-55.01)        | 0.32 (0.17-0.56)                     | 1.34 (0.79-2.05)        | 0.12 (0.07-0.18)         |
| Bahrain                    | 63.34 (39.12-95.64)    | 10.4 (6.19-16.19)          | 0.73 (0.39-1.30)                     | 0.85 (0.52-1.35)        | 0.60 (0.36-0.93)         |
| Djibouti                   | 20.80 (11.59-34.69)    | 31.81 (17.78-50.51)        | 0.21 (0.11-0.36)                     | 0.11 (0.06-0.19)        | 0.21 (0.12-0.34)         |
| Egypt                      | 42.80 (24.22-67.41)    | 25.86 (14.04-43.62)        | 0.49 (0.26-0.87)                     | 0.78 (0.44-1.26)        | 0.29 (0.16-0.49)         |
| Iran (Islamic Republic of) | 46.48 (28.41-71.46)    | 42.12 (24.48-64.92)        | 0.39 (0.22-0.63)                     | 1.42 (0.88-2.19)        | 0.32 (0.19-0.48)         |
| Iraq                       | 53.65 (31.94-82.85)    | 23.03 (13.41-36.06)        | 0.59 (0.33-1)                        | 1.39 (0.82-2.12)        | 0.07 (0.04-0.10)         |
| Jordan                     | 42.75 (25.50-65.83)    | 56.53 (33.30-88.75)        | 0.42 (0.22-0.76)                     | 0.53 (0.32-0.81)        | 0.11 (0.07-0.16)         |
| Kuwait                     | 46.58 (28.29-72.51)    | 47.03 (27.86-72.32)        | 0.98 (0.52-1.71)                     | 0.53 (0.33-0.80)        | 0.12 (0.07-0.18)         |
| Lebanon                    | 31.54 (18.62-48.94)    | 44.87 (26.73-68.53)        | 0.46 (0.25-0.80)                     | 0.88 (0.53-1.39)        | 0.42 (0.26-0.66)         |
| Libya                      | 38.49 (23.08-58.71)    | 37.46 (22.50-56.73)        | 0.59 (0.32-1.04)                     | 0.65 (0.39-1.01)        | 0.25 (0.15-0.40)         |
| Morocco                    | 42.83 (25.79-65.64)    | 36.47 (21.65-57.27)        | 0.38 (0.20-0.68)                     | 1.21 (0.73-1.86)        | 0.24 (0.14-0.37)         |
| Oman                       | 39.48 (24.50-57.39)    | 15.72 (9.73-23.49)         | 0.57 (0.30-1.01)                     | 0.25 (0.16-0.37)        | 0.12 (0.07-0.18)         |
| Palestine                  | 44.19 (27.19-66.67)    | 32.42 (19.25-50.04)        | 0.33 (0.17-0.59)                     | 0.52 (0.32-0.80)        | 0.07 (0.05-0.11)         |
| Pakistan                   | 15.29 (9.01-23.31)     | 10.47 (5.94-16.97)         | 0.20 (0.11-0.35)                     | 2.79 (1.72-4.20)        | 0.08 (0.05-0.13)         |
| Qatar                      | 68.21 (44.29-97.63)    | 9.45 (5.80-14)             | 1.70 (0.87-3)                        | 1.18 (0.74-1.81)        | 0.41 (0.27-0.59)         |
| Saudi Arabia               | 45.89 (28.15-70.62)    | 5.77 (3.34-9.35)           | 0.58 (0.31-1.02)                     | 0.76 (0.45-1.19)        | 0.07 (0.04-0.11)         |
| Somalia                    | 17.80 (9.80-30.01)     | 26.36 (14.65-42.57)        | 0.11 (0.06-0.19)                     | 0.09 (0.05-0.16)        | 0.22 (0.12-0.35)         |
| Sudan                      | 32.79 (19.57-50.59)    | 33.82 (20.08-53.25)        | 0.32 (0.17-0.58)                     | 1.10 (0.66-1.73)        | 0.17 (0.10-0.27)         |
| Syrian Arab Republic       | 54.27 (32.94-81.95)    | 9.75 (5.66-15.26)          | 0.74 (0.43-1.17)                     | 1.92 (1.14-3.05)        | 0.25 (0.15-0.39)         |
| Tunisia                    | 40.85 (24.02-61.93)    | 34.79 (20.33-54.48)        | 0.40 (0.22-0.69)                     | 0.79 (0.48-1.21)        | 0.23 (0.14-0.36)         |
| United Arab Emirates       | 32.99 (19.75-50.36)    | 41.24 (25.19-63.98)        | 0.93 (0.50-1.64)                     | 1.60 (0.91-2.57)        | 0.23 (0.14-0.37)         |
| Yemen                      | 32.41 (18.98-49.51)    | 36.48 (22.01-56.5)         | 0.35 (0.19-0.61)                     | 1.30 (0.77-2.02)        | 0.15 (0.09-0.23)         |
| <b>2019</b>                |                        |                            |                                      |                         |                          |
| Global                     | 28.43 (17.39-42.37)    | 21.72 (12.96-33.92)        | 2.53 (1.41-4.30)                     | 1.87 (1.17-2.80)        | 1.22 (0.78-1.82)         |
| EMR                        | 36.92 (22.41-56.43)    | 26.96 (15.81-42.60)        | 0.39 (0.22-0.67)                     | 1.6 (0.98-2.37)         | 0.20 (0.12-0.31)         |
| Afghanistan                | 30 (18.12-45.89)       | 37.92 (22.93-58.41)        | 0.31 (0.16-0.54)                     | 1.46 (0.88-2.22)        | 0.13 (0.08-0.20)         |
| Bahrain                    | 55.21 (34.08-83.18)    | 9.89 (5.91-15.36)          | 0.74 (0.39-1.27)                     | 0.82 (0.49-1.30)        | 0.59 (0.35-0.93)         |
| Djibouti                   | 24.41 (13.39-40.25)    | 33.71 (18.73-54.38)        | 0.17 (0.09-0.30)                     | 0.12 (0.06-0.21)        | 0.23 (0.13-0.37)         |
| Egypt                      | 43.87 (25.69-70.66)    | 26.75 (14.29-45.27)        | 0.54 (0.30-0.93)                     | 0.83 (0.45-1.40)        | 0.33 (0.18-0.56)         |
| Iran (Islamic Republic of) | 44.58 (27.28-68.31)    | 41.15 (24.10-62.94)        | 0.34 (0.19-0.58)                     | 1.47 (0.91-2.30)        | 0.32 (0.20-0.50)         |
| Iraq                       | 50.33 (30-79.17)       | 22.83 (13.25-35.65)        | 0.49 (0.27-0.83)                     | 1.42 (0.83-2.16)        | 0.07 (0.04-0.10)         |
| Jordan                     | 41.05 (24.14-62.95)    | 59.47 (35.20-91.21)        | 0.49 (0.26-0.86)                     | 0.55 (0.34-0.85)        | 0.11 (0.07-0.17)         |
| Kuwait                     | 48.90 (29.27-73.68)    | 47 (27.63-72.86)           | 0.85 (0.45-1.50)                     | 0.53 (0.33-0.80)        | 0.12 (0.08-0.19)         |
| Lebanon                    | 36.52 (21.71-56.94)    | 47.58 (28.11-72.11)        | 0.34 (0.18-0.60)                     | 0.96 (0.59-1.47)        | 0.47 (0.28-0.73)         |
| Libya                      | 47.55 (28.24-73.09)    | 39.4 (23.17-61.13)         | 0.48 (0.26-0.84)                     | 0.71 (0.43-1.09)        | 0.30 (0.18-0.47)         |
| Morocco                    | 41.21 (24.52-63.89)    | 36.92 (21.57-56.9)         | 0.40 (0.22-0.71)                     | 1.22 (0.73-1.87)        | 0.25 (0.15-0.39)         |
| Oman                       | 53.29 (33.1-80.18)     | 18.82 (11.18-29.14)        | 0.45 (0.24-0.78)                     | 0.30 (0.18-0.46)        | 0.12 (0.07-0.19)         |
| Palestine                  | 43.91 (26.87-66.81)    | 32.43 (18.99-50.12)        | 0.33 (0.17-0.61)                     | 0.53 (0.33-0.79)        | 0.07 (0.05-0.11)         |
| Pakistan                   | 15.96 (9.49-24.87)     | 10.55 (6.02-17.32)         | 0.21 (0.12-0.37)                     | 2.89 (1.76-4.31)        | 0.08 (0.05-0.13)         |
| Qatar                      | 61.68 (38.07-94.43)    | 8.92 (5.29-13.85)          | 1.19 (0.63-2.05)                     | 0.97 (0.59-1.46)        | 0.35 (0.21-0.53)         |



|                      |                     |                     |                  |                  |                  |
|----------------------|---------------------|---------------------|------------------|------------------|------------------|
| Saudi Arabia         | 57.2 (34.07-86.61)  | 6.37 (3.76-10.26)   | 0.69 (0.37-1.24) | 0.85 (0.51-1.33) | 0.09 (0.05-0.13) |
| Somalia              | 20.25 (11.35-33.27) | 27.35 (15.14-44.94) | 0.09 (0.05-0.15) | 0.10 (0.05-0.17) | 0.23 (0.13-0.38) |
| Sudan                | 39.39 (23.48-60.57) | 37 (22.03-57.70)    | 0.35 (0.18-0.60) | 1.25 (0.75-1.93) | 0.19 (0.11-0.29) |
| Syrian Arab Republic | 60.62 (37.29-90.61) | 10.26 (5.99-16.11)  | 0.60 (0.36-0.96) | 2.06 (1.24-3.21) | 0.28 (0.17-0.44) |
| Tunisia              | 43.30 (25.39-66.95) | 35.66 (21.24-54.95) | 0.36 (0.20-0.64) | 0.82 (0.50-1.28) | 0.25 (0.15-0.39) |
| United Arab Emirates | 35.64 (21.13-54.65) | 42.07 (25.07-65.33) | 1.21 (0.63-2.12) | 1.59 (0.91-2.52) | 0.22 (0.13-0.35) |
| Yemen                | 35.72 (21.41-54.6)  | 38.19 (22.32-58.47) | 0.33 (0.17-0.58) | 1.38 (0.84-2.10) | 0.16 (0.09-0.25) |

YLD= years lived with disability. EMR=Eastern Mediterranean Region.

**Table S8. Age-standardised YLD rate (per 100,000 persons) of heart failure due to each underlying cause for females in 1990 and 2019 by EMR countries.**

|                            | Ischemic heart disease | Hypertensive heart disease | Non-rheumatic valvular heart disease | Rheumatic heart disease | Alcoholic cardiomyopathy |
|----------------------------|------------------------|----------------------------|--------------------------------------|-------------------------|--------------------------|
| <b>1990</b>                |                        |                            |                                      |                         |                          |
| Global                     | 23.09 (14.07-35.05)    | 18.09 (10.85-27.87)        | 4.27 (2.45-7.22)                     | 2.61 (1.62-3.89)        | 0.63 (0.39-0.94)         |
| EMR                        | 19.72 (11.99-30.03)    | 21.82 (12.91-33.57)        | 0.47 (0.27-0.80)                     | 1.99 (1.24-2.98)        | 0.11 (0.06-0.17)         |
| Afghanistan                | 13.55 (8.04-20.75)     | 23.97 (14.49-36.47)        | 0.47 (0.24-0.83)                     | 1.20 (0.70-1.88)        | 0.16 (0.09-0.25)         |
| Bahrain                    | 31.99 (19.11-48.84)    | 18.53 (10.98-28.78)        | 0.99 (0.52-1.72)                     | 1.29 (0.79-2.02)        | 0.28 (0.17-0.42)         |
| Djibouti                   | 9.54 (5.18-16.14)      | 22.4 (12.36-36.11)         | 0.22 (0.12-0.38)                     | 0.34 (0.19-0.55)        | 0.10 (0.05-0.16)         |
| Egypt                      | 22.84 (13.01-37.24)    | 22.66 (12.57-37.01)        | 0.61 (0.33-1.05)                     | 0.84 (0.49-1.41)        | 0.16 (0.08-0.26)         |
| Iran (Islamic Republic of) | 26.5 (16.12-41.05)     | 33.21 (19.86-50.70)        | 0.54 (0.31-0.89)                     | 1.74 (1.06-2.67)        | 0.10 (0.06-0.15)         |
| Iraq                       | 32.7 (19.72-49.93)     | 22.08 (13.07-34.43)        | 0.77 (0.42-1.35)                     | 1.38 (0.82-2.22)        | 0.07 (0.04-0.11)         |
| Jordan                     | 15.96 (9.50-24.40)     | 40.19 (24.85-60.41)        | 0.55 (0.29-0.98)                     | 0.52 (0.32-0.79)        | 0.03 (0.02-0.05)         |
| Kuwait                     | 18.36 (10.93-28.39)    | 45.25 (27.04-68.61)        | 0.74 (0.39-1.34)                     | 0.68 (0.42-1.04)        | 0.06 (0.04-0.10)         |
| Lebanon                    | 27.22 (16.10-41.49)    | 29.44 (17.66-45.29)        | 0.61 (0.33-1.03)                     | 0.70 (0.43-1.05)        | 0.1 (0.06-0.15)          |
| Libya                      | 21.83 (12.90-33.48)    | 28.69 (17.05-44.33)        | 0.68 (0.36-1.20)                     | 0.85 (0.51-1.29)        | 0.08 (0.05-0.13)         |
| Morocco                    | 22.12 (13.39-33.65)    | 27.05 (16.08-42.16)        | 0.55 (0.30-0.94)                     | 1.29 (0.77-2.02)        | 0.16 (0.09-0.27)         |
| Oman                       | 21.61 (13.19-31.99)    | 16.83 (10.12-25.57)        | 0.77 (0.41-1.37)                     | 0.31 (0.19-0.48)        | 0.04 (0.02-0.06)         |
| Palestine                  | 23.53 (14.21-36.06)    | 28.13 (16.86-44)           | 0.46 (0.23-0.84)                     | 0.79 (0.48-1.21)        | 0.13 (0.08-0.2)          |
| Pakistan                   | 11.52 (6.89-17.71)     | 13.26 (7.61-21.03)         | 0.16 (0.09-0.27)                     | 3.83 (2.32-5.80)        | 0.04 (0.02-0.07)         |
| Qatar                      | 30.71 (18.55-45.47)    | 12.17 (7.28-18.37)         | 1.23 (0.66-2.15)                     | 0.90 (0.55-1.39)        | 0.17 (0.10-0.25)         |
| Saudi Arabia               | 25.42 (15.53-39.36)    | 10.57 (6.15-16.59)         | 0.95 (0.49-1.69)                     | 1.02 (0.60-1.55)        | 0.18 (0.11-0.29)         |
| Somalia                    | 8.20 (4.50-13.90)      | 18.86 (10.63-30.34)        | 0.14 (0.08-0.24)                     | 0.28 (0.15-0.48)        | 0.29 (0.15-0.48)         |
| Sudan                      | 17.36 (10.45-26.53)    | 24.8 (14.69-38.41)         | 0.47 (0.26-0.82)                     | 1.09 (0.67-1.68)        | 0.19 (0.11-0.31)         |
| Syrian Arab Republic       | 33.89 (20.45-51.64)    | 9.24 (5.45-14.45)          | 1.29 (0.76-2.03)                     | 1.92 (1.09-3)           | 0.12 (0.07-0.19)         |
| Tunisia                    | 21.79 (13-34.17)       | 31.79 (19.24-48.62)        | 0.56 (0.30-1)                        | 0.96 (0.59-1.52)        | 0.09 (0.05-0.13)         |
| United Arab Emirates       | 16.48 (9.79-25.05)     | 28.81 (17.58-44.21)        | 1.01 (0.52-1.75)                     | 1.25 (0.75-1.94)        | 0.11 (0.07-0.17)         |
| Yemen                      | 16.72 (9.94-25.69)     | 27.69 (16.54-42.18)        | 0.50 (0.27-0.85)                     | 1.19 (0.71-1.83)        | 0.13 (0.08-0.20)         |
| <b>2019</b>                |                        |                            |                                      |                         |                          |
| Global                     | 19.94 (12.17-29.83)    | 20.16 (12.17-31.21)        | 3.04 (1.71-5.10)                     | 2.86 (1.80-4.29)        | 0.38 (0.24-0.56)         |
| EMR                        | 21.26 (12.93-32.76)    | 23.49 (13.76-36.48)        | 0.48 (0.27-0.82)                     | 1.99 (1.22-3.02)        | 0.11 (0.07-0.17)         |
| Afghanistan                | 15.34 (9.01-23.40)     | 26.43 (16.07-41.16)        | 0.47 (0.25-0.82)                     | 1.32 (0.80-2.11)        | 0.16 (0.09-0.26)         |
| Bahrain                    | 25.6 (15.28-39.06)     | 17.83 (10.62-27.79)        | 0.84 (0.46-1.47)                     | 1.24 (0.73-1.94)        | 0.27 (0.17-0.42)         |
| Djibouti                   | 10.88 (5.88-18.02)     | 23.46 (12.66-37.12)        | 0.18 (0.10-0.31)                     | 0.37 (0.20-0.64)        | 0.11 (0.06-0.17)         |
| Egypt                      | 23.92 (13.49-39.08)    | 23.84 (12.88-39.87)        | 0.67 (0.38-1.17)                     | 0.92 (0.54-1.50)        | 0.18 (0.10-0.29)         |

|                            |                     |                     |                  |                  |                  |
|----------------------------|---------------------|---------------------|------------------|------------------|------------------|
| Iran (Islamic Republic of) | 25.07 (15.2-38.83)  | 32.05 (19.02-48.68) | 0.50 (0.28-0.81) | 1.73 (1.06-2.72) | 0.10 (0.06-0.15) |
| Iraq                       | 31.67 (18.71-49.34) | 22.27 (13.18-34.53) | 0.66 (0.36-1.15) | 1.43 (0.83-2.22) | 0.07 (0.04-0.10) |
| Jordan                     | 15.01 (9.02-23.1)   | 41.44 (25.77-62.57) | 0.52 (0.27-0.93) | 0.53 (0.33-0.81) | 0.04 (0.02-0.05) |
| Kuwait                     | 18.30 (11.04-28.20) | 45.5 (27.89-68.4)   | 0.67 (0.36-1.18) | 0.69 (0.43-1.05) | 0.07 (0.04-0.10) |
| Lebanon                    | 30.77 (18.54-46.88) | 31.46 (18.87-49.15) | 0.46 (0.25-0.80) | 0.75 (0.46-1.16) | 0.11 (0.07-0.16) |
| Libya                      | 26.87 (16.02-41.09) | 30.55 (18.55-47.3)  | 0.61 (0.33-1.08) | 0.91 (0.55-1.38) | 0.10 (0.06-0.15) |
| Morocco                    | 21.12 (12.57-32.46) | 27.57 (16.38-42.34) | 0.59 (0.31-1.01) | 1.3 (0.79-2.07)  | 0.17 (0.10-0.27) |
| Oman                       | 29.39 (17.58-44.16) | 21.51 (13.03-33.07) | 0.59 (0.33-1.04) | 0.42 (0.26-0.63) | 0.03 (0.02-0.05) |
| Palestine                  | 24.45 (14.51-36.89) | 28.66 (17.05-44.48) | 0.47 (0.24-0.87) | 0.81 (0.49-1.25) | 0.14 (0.09-0.21) |
| Pakistan                   | 12.38 (7.30-19.36)  | 13.83 (7.85-22.30)  | 0.16 (0.09-0.27) | 4.03 (2.43-6.09) | 0.04 (0.02-0.07) |
| Qatar                      | 26.61 (15.77-40.15) | 11.77 (7.03-18.24)  | 1.08 (0.56-1.88) | 0.82 (0.50-1.25) | 0.16 (0.10-0.24) |
| Saudi Arabia               | 32.34 (19.11-49.94) | 11.75 (7.02-18.44)  | 0.88 (0.46-1.59) | 1.13 (0.68-1.75) | 0.22 (0.13-0.34) |
| Somalia                    | 9.04 (5.02-15.16)   | 19.06 (10.13-30.96) | 0.11 (0.07-0.19) | 0.30 (0.16-0.49) | 0.3 (0.16-0.48)  |
| Sudan                      | 21.94 (13.22-33.72) | 27.53 (16.24-42.92) | 0.52 (0.27-0.90) | 1.26 (0.74-2)    | 0.21 (0.12-0.34) |
| Syrian Arab Republic       | 38.85 (24-58.29)    | 9.97 (5.87-15.68)   | 1.17 (0.70-1.80) | 2.10 (1.25-3.37) | 0.14 (0.08-0.22) |
| Tunisia                    | 23.16 (14.24-35.27) | 32.83 (19.84-51.12) | 0.52 (0.28-0.91) | 1 (0.62-1.51)    | 0.10 (0.06-0.15) |
| United Arab Emirates       | 18.03 (10.88-27.73) | 29.81 (17.99-45.87) | 1.06 (0.57-1.89) | 1.24 (0.72-2.05) | 0.10 (0.06-0.15) |
| Yemen                      | 19.19 (11.28-30.58) | 29.46 (17.43-45.33) | 0.49 (0.26-0.84) | 1.29 (0.77-2.01) | 0.14 (0.08-0.23) |

YLD= years lived with disability. EMR=Eastern Mediterranean Region.
